# Supplementary material
Source: PubMed Central journal article supplement (PMC5706068)
Supplement: se7b00695_si_001.pdf [file se7b00695_si_001.pdf]

## Supporting information

### Semisynthetic bioluminescent sensor proteins for direct detection of antibodies and small molecules in solution

Remco Arts, Susann K.J. Ludwig, Benice C.B. van Gerven, Eva Magdalena Estirado, Lech-Gustav Milroy and Maarten Merkx\*

Laboratory of Chemical Biology and Institute for Complex Molecular Systems (ICMS), Department of Biomedical Engineering, Eindhoven University of Technology, P.O. Box 513, 5600 MB Eindhoven, The Netherlands.

|                                                                                            |     |
|--------------------------------------------------------------------------------------------|-----|
| <b>Figure S1:</b> DNA and amino acid sequence of TAG-LUMABS                                | S2  |
| <b>Supplementary methods</b>                                                               | S3  |
| <b>Scheme S1:</b> Synthesis of DBCO-PEG-DNP                                                | S3  |
| <b>Scheme S2:</b> Synthesis of DBCO-creatinine                                             | S4  |
| <b>Figure S2:</b> LC/MS of DNP-DBCO                                                        | S6  |
| <b>Figure S3:</b> LC/MS of creatinine ester (2)                                            | S7  |
| <b>Figure S4:</b> LC/MS of DBCO-creatinine (3)                                             | S8  |
| <b>NMR analysis of creatinine ester (2)</b>                                                | S8  |
| <b>Figure S5:</b> <sup>1</sup> H NMR of creatinine ester (2)                               | S9  |
| <b>Figure S6:</b> <sup>13</sup> C NMR of creatinine ester (2)                              | S9  |
| <b>Figure S7:</b> COSY NMR of creatinine ester (2)                                         | S10 |
| <b>Figure S8:</b> HSQC NMR of creatinine ester (2)                                         | S10 |
| <b>Figure S9:</b> HMBC NMR of creatinine ester (2)                                         | S11 |
| <b>Table S1:</b> Assignment of Compound <b>2</b> protons and their correlations in 2D NMR. | S11 |
| <b>References</b>                                                                          | S12 |

atgggcagcagccatcatcatcatcacagcagcggcctggtgccgcgagccat  
 M G S S H H H H H S S G L V P R G S H  
 atggtagcagcacaactttatatacaaggcgaaggcgtctatccctatgatgcagat  
 M A S D D N F I Y K A K A L Y P Y D A D  
 gatgatgacgcatacgaatctcattcgaacaaaatgaatccttcaggtatcagacatt  
 D D D A Y E I S F E Q N E I L Q V S D I  
 gagggcggtgggaaagcccgcgccaatggagagacaggcatcatcccgtcgaat  
 E G R W W K A R R A N G E T G I I P S N  
 tatggtcagttgattgacggctcctgaggaaatgcatcggggcggtcgggaggctcaggc  
 Y V Q L I D G P E E M H R G G S G G S G  
 agccatcttggtaagtaaggtgaggaacaatataagcttctctgctccacacatga  
 S H A V E K Q E E D N N A S L P A T H I  
 ctccatatttttggagacataaaaggaatagatttcgagatagataggtcaggtacggat  
 L H I F G S I N G V D F D M V G Q G T G  
 aaccctaacgatagattdaggaatigaaatctcaaaagcacaagggatgatctagagt  
 N P N D Q T E E L N L E S T E G D L Q I  
 tacccttagatctggtagccgcatalaagttatagtttccatcagatatttccataccg  
 S P W I L V P H I G T Q P H Q T L P T I  
 galggcatdaggctttagggcgcaatgtagatggtcagatataagtagatcag  
 D G N S T P F Q A A N V D G S G T Q V H I  
 accatgagttttagagatggggcctctttagcagtaaaftacaggtacaacctatdaggat  
 T M Q P E D Q A S L T V N T E T T T E I  
 aaccctataaaggagcggcaggtgaaaggaactgaattccagcagatggccagta  
 S H I K Q R A Q V K G T G F P A D G P I  
 atgacaacagcctcaccgctgatgatggtagagatcaagaaaacgatccaaagca  
 N T N S L T A A D W C R S K E T T P R I  
 aaactatcattctactttaaagtggtcctatcaaacaggaagggaaacgatctatc  
 K T I I S T P E W G T T T G N D K R Y I  
 taaagcccgccagcagctacacgtttcaaaaacaaatggctacgaattatcfaaaa  
 S T A R T T T T F A K P H A A N T L E I  
 cagcagatgatattgttngtaaacccaactgaacacattctaaaagcagctcaatt  
 Q P N I V P R E T E L E H S E T E L E I  
 aaggaatggcagagggcattttaggatataaggaatggcagaaactgatataatcgggc  
 L E W Q K A F T D V N Q M D E L L Y S G  
 ggaggtaccggcgagcggcggtctctaggggggttcgggtggttcaggcggctcagga  
 G G T G G S G G G S G G S G G S G G S G  
 ggctccgggggttcgggagggagcgggtgctgaagccgcagccaaggaagcagcagctaaa  
 G S G G S G G S G A E A A A K E A A A K  
 gaggcgctgcgaaggaagctgccgcaaaggaggcggcgcaagaggcggcagcaaaa  
 E A A A K E A A A A K E A A A A K E A A A K  
 gccgatctggtggcagtggtggctccggcgggtcaggtggcagcgggggatcaggagct  
 A G S G G S G G S G G S G G S G G S G A  
 gaggcagccgcaagaggctgcggccaaggaggcccgctaaagaagccgcggcaaaa  
 E A A A K E A A A A K E A A A A K E A A A K  
 gaggcagcggcaaggaagcggctgcgaagccggaagtgggtgggtcggcggtccggt  
 E A A A K E A A A K A G S G G S G G S G  
 ggctctggcggcagtggtggtagtgccggtaggggtggtctggtggttagcactagtgga  
 G S G G S G S G G G G G S G S T S G  
 ggtagcagtggtatttactcttgaagattttgtcggtgatggcgccagaccggcgtat  
 G S M V F T L E D F V G D W R Q T A G Y  
 aactggaccaagtgctgaacagggcgggttagcagcctgttcaaacctgggggtg  
 N L D Q V L E Q G G V S S L F Q N L G V  
 agtgtcacgccaattcagggcatcgttctgtcgggagagaatggctgaaaatcgatata  
 S V T P I Q R I V L S G E N G L K I D I  
 cacgtcattatccpgtagaaggtcttctggtgatcagatggggcagatagaaaaata  
 H V I I P Y E G L S G D Q M G Q I E K I  
 tcaagtggtgtaccagtagacgatcatcacttcaaggtatactgcactatggcacc  
 F K V V Y P V D D H H F K V I L H Y G T  
 ctcgttatcgatggcgttactccgaatatgatcgattactttggcgtccttatgaaggt  
 L V I D G V T P N M I D Y F G R P Y E G  
 attgcggtgttcgacggtaaaaaattacggttaccgggacgctctggaatggtataaaa  
 I A V F D G K K I T V T G T L W N G N K  
 atcattgatgagcgttgataaacccagatggcagcctctgttcagagttacgataaac  
 I I D E R L I N P D G S L L F R V T I N  
 ggggttacgggttggcgactgtgcaagaataattagcttctagcgggtggaggatct  
 G V T G W R L C E R I L A S S G G G S I  
 gttcaagccgctgcaaccctaccggtggaggaagctggagccatccgcagtttgaa  
 E S R P L P P L P V G G S W S H P Q F E  
 aaataa  
 K -

**Figure S1:** DNA and amino acid sequence of TAG-LUMABS. Areas of interest are indicated as follows: SH3 domain (yellow), mNeonGreen (green), TAG codons (cyan), NanoLuc (blue), proline-rich peptide (red).

## Supplementary methods

### Synthesis of DBCO-functionalized small molecules

#### General

All used solvents were obtained from Biosolve BV and used without further purification. Water was purified using a Millipore purification train. LC-MS was performed on a C4, Jupiter SuC4300A, 150x2.00 mm column using H<sub>2</sub>O with 0.1 % formic acid and acetonitrile with 0.1% formic acid using a gradient of 5% to 100% acetonitrile in 10 min and a flow rate of 0.2 mL/min. Preparative HPLC was performed on a Gemini S4 110A 150x21.20 mm column using H<sub>2</sub>O with 0.1% F.A. and acetonitrile with 0.1% F.A, with gradients as indicated per synthesis. NMR spectroscopy data was recorded with a Bruker Advance-III 400 MHz using a BBFO probe from Bruker (400 MHz for <sup>1</sup>H and 100 MHz for <sup>13</sup>C). Chemical shifts are reported in parts per million (ppm) referenced to an internal standard of residual [D]chloroform ( $\delta = 7.26$  ppm for <sup>1</sup>H and  $\delta = 77$  ppm for <sup>13</sup>C, relative to tetramethylsilane as an internal standard).

#### DNP-DBCO

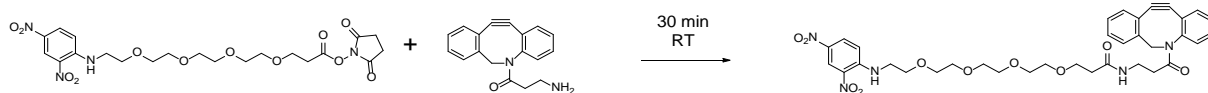

#### *Scheme S1: Synthesis of DBCO-PEG-DNP.*

2 mg (7  $\mu$ mol) DBCO-NH<sub>2</sub> (Sigma-Aldrich, 761540-10MG) was coupled to DNP-dPEG4-NHS ester (Quanta Biodesign, 10347, 1.5 equivalents) in a 30 minute reaction in PBS (pH = 7.2) in a total volume of 2.25 mL at room temperature. This product was purified using preparative HP-LC (60-80% ACN/H<sub>2</sub>O gradient). Product purity was confirmed using LC-MS ( $MW_{\text{calc}} = 689.72$ ,  $MW_{\text{obs}} = 690.42$ ).

## CR-DBCO

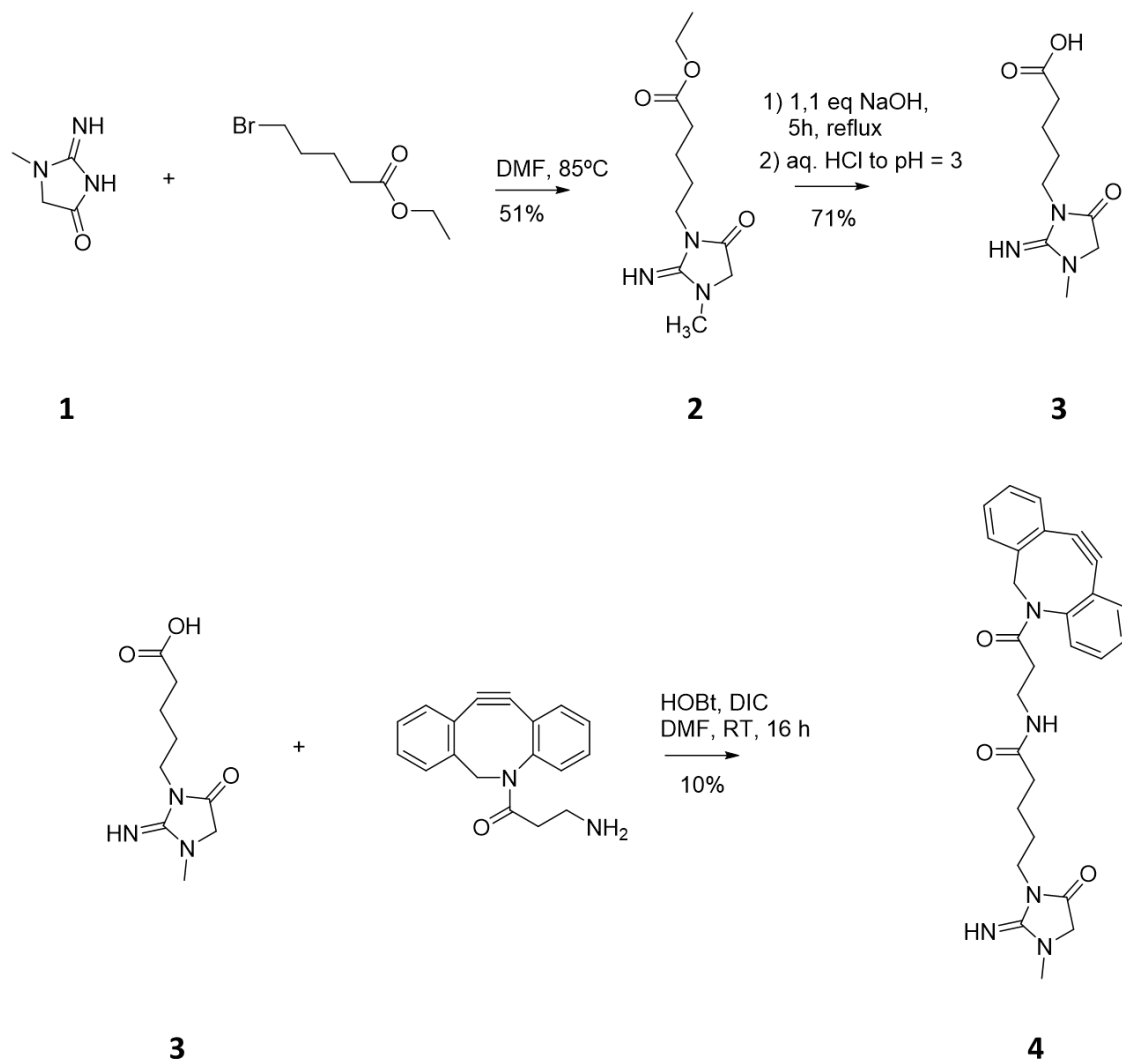

**Scheme S2:** Synthesis of DBCO-creatinine

DBCO-NH<sub>2</sub> was coupled to creatinine in a three-step synthesis based on the protocol reported by Binkert *et al.* (see Scheme S2).<sup>1</sup> 8 mmol of creatinine (Sigma-Aldrich; C4255) was dissolved in 5 mL dimethylformamide (DMF) in a round-bottomed flask fitted with a magnetic stirring bar and heated with stirring (in an oil bath) until completely dissolved. 1.25 equivalent of 5-ethyl-bromovalerate (Sigma-Aldrich; cat no. 14660-52-7) was added to the reaction mixture and left to react for 16 hours. The product (**2**) was obtained via precipitation in ethylacetate and isolated by filtration. The reaction mixture was further purified by silica gel (40-63 μm) column purification (1:9 MeOH:CHCl<sub>3</sub>). The isolated creatinine ester (**2**) was characterized by LC-MS (Figure S3) and NMR spectroscopy (Figure S5-9). To obtain the

creatinine-acid (**3**), the creatinine ester (**2**) produced in the previous was dissolved in 3 mL of H<sub>2</sub>O, treated with 1.1 equivalent NaOH, and the reaction heated overnight under reflux. After cooling to room temperature the pH of the reaction mixture was adjusted to pH = 3 through the addition of 0.2 M aq. HCl. The creatinine acid was treated with 1 equivalent of diisopropylcarbodiimide (DIC), to activate the carboxylic acid, and left to stir at room temperature for 20 minutes. 1 equivalent hydroxybenzotriazole (HOBt) was then added, and the reaction stirred for an additional 20 minutes. Finally, 0.2 equivalent DBCO-amine was added and the reaction monitored with LC/MS (Figure S4). The final product, DBCO-creatinine (**4**), was purified using preparative LC-MS (23-55% ACN/H<sub>2</sub>O gradient) and characterized by LC-MS: MW<sub>calc</sub> = 471.56, MW<sub>obs</sub> = 472.17 (Figure S4).

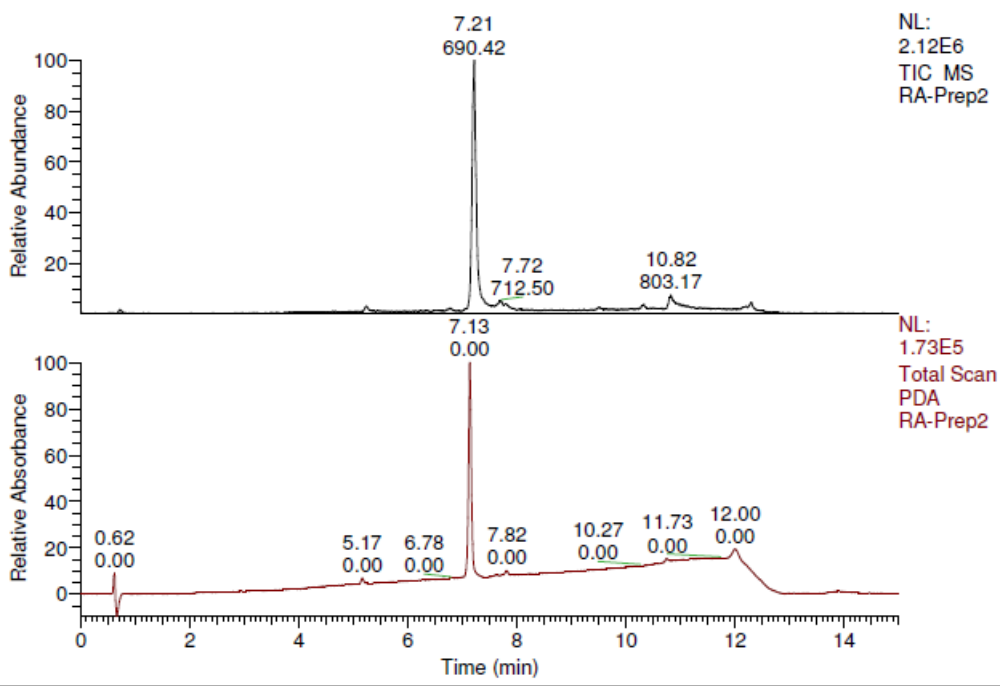

RA-Prep2 #560-586 RT: 7.09-7.41 AV: 27 NL: 4.25E4  
 T: ITMS + p ESI Full ms [100.00-2000.00]

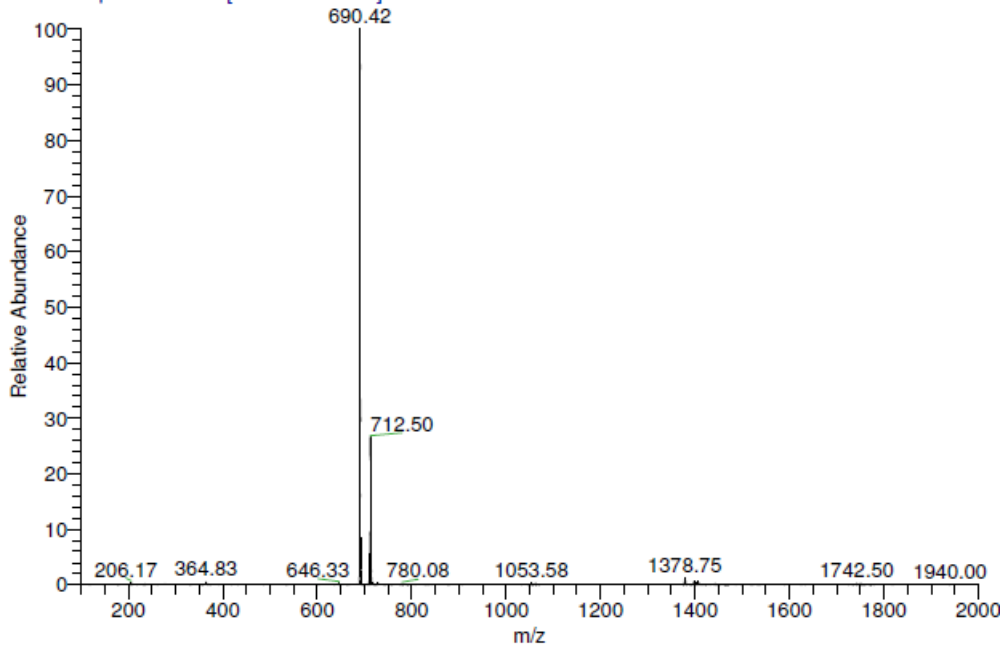

**Figure S2:** LC/MS of DNP-DBCO. Top: total ion count. Middle: UV-trace. Bottom: Mass spectrum. Expected mass:  $[M+H]^+ = 690.42$  Da.

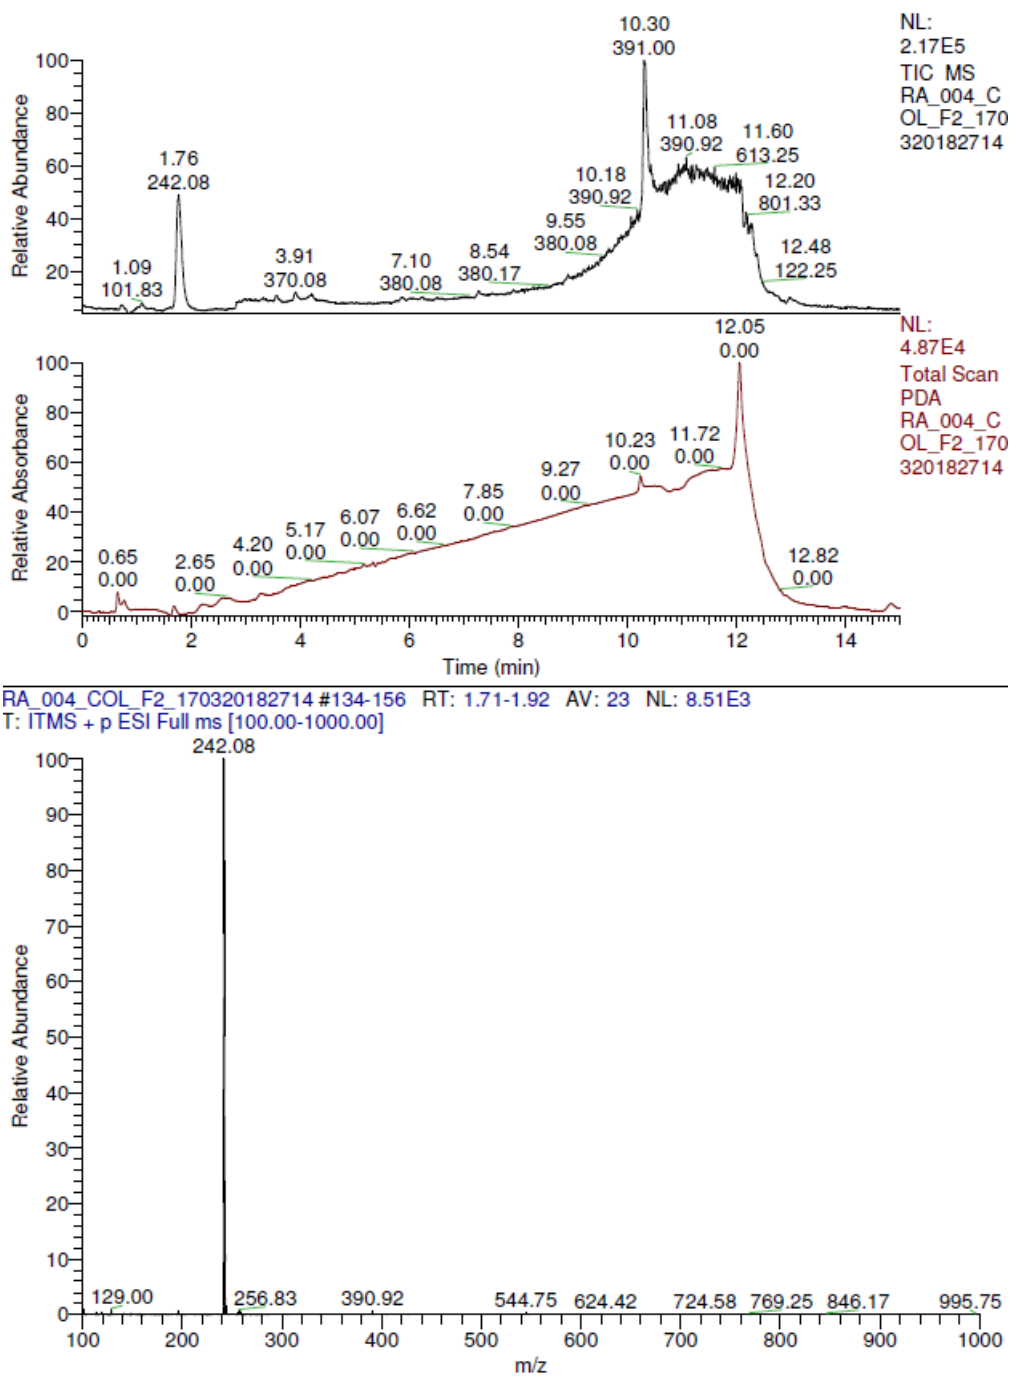

**Figure S3:** LC/MS of creatinine ester **2**. Top: total ion count. Middle: UV-trace. Bottom: Mass spectrum. Expected mass:  $[M+H]^+ = 242.08$  Da.

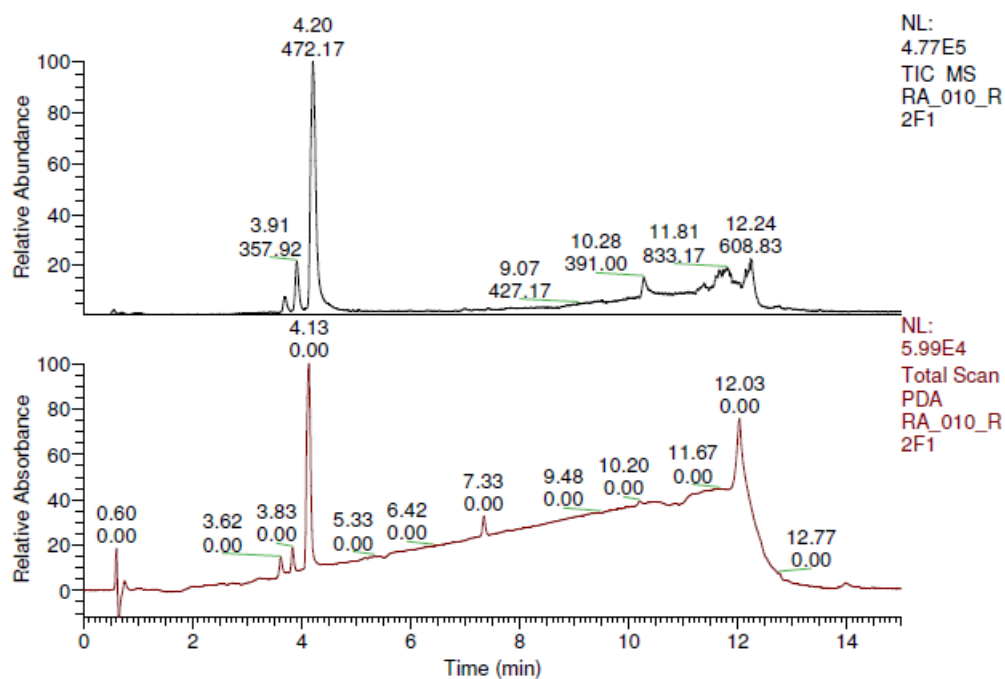

RA\_010\_R2F1 #284-371 RT: 3.64-4.55 AV: 88 NL: 6.35E3  
 T: ITMS + p ESI Full ms [100.00-1000.00]

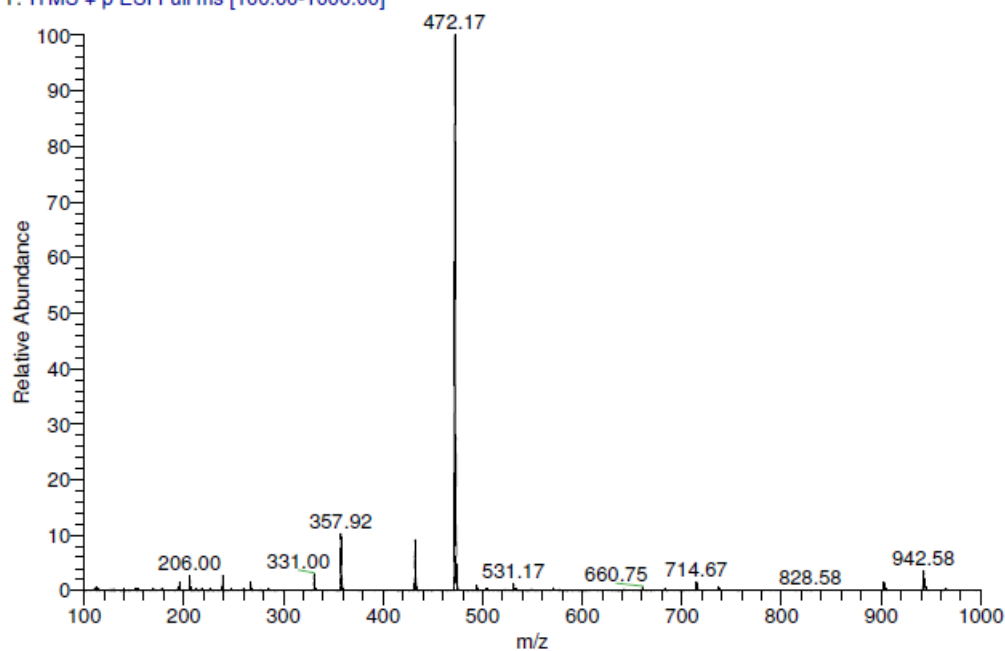

**Figure S4:** LC/MS of DBCO-creatinine **4**. Top: total ion count. Middle: UV-trace. Bottom: Mass spectrum. Expected mass:  $[M+H]^+ = 472.17$  Da. Compound **4** was obtained with a purity of 85.7%.



## NMR Spectra of creatinine ester (Compound 2)

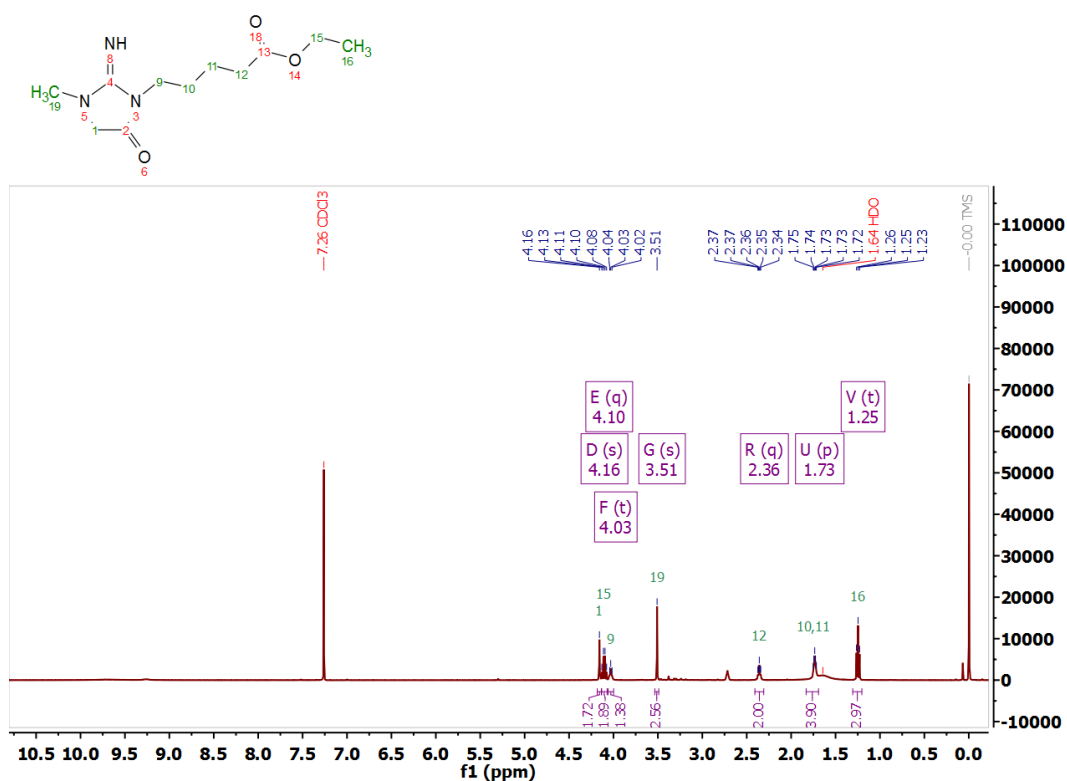

**Figure S5:**  $^1\text{H}$  NMR of Compound 2 (400 MHz, Chloroform-*d*)  $\delta$  4.16 (s, 2H), 4.10 (q,  $J = 7.2$  Hz, 2H), 4.03 (t,  $J = 5.2$  Hz, 1H), 3.51 (s, 3H), 2.36 (q,  $J = 5.0, 3.6$  Hz, 2H), 1.73 (p,  $J = 3.6$  Hz, 4H), 1.25 (t,  $J = 7.1$  Hz, 3H).

## $^{13}\text{C}$ NMR

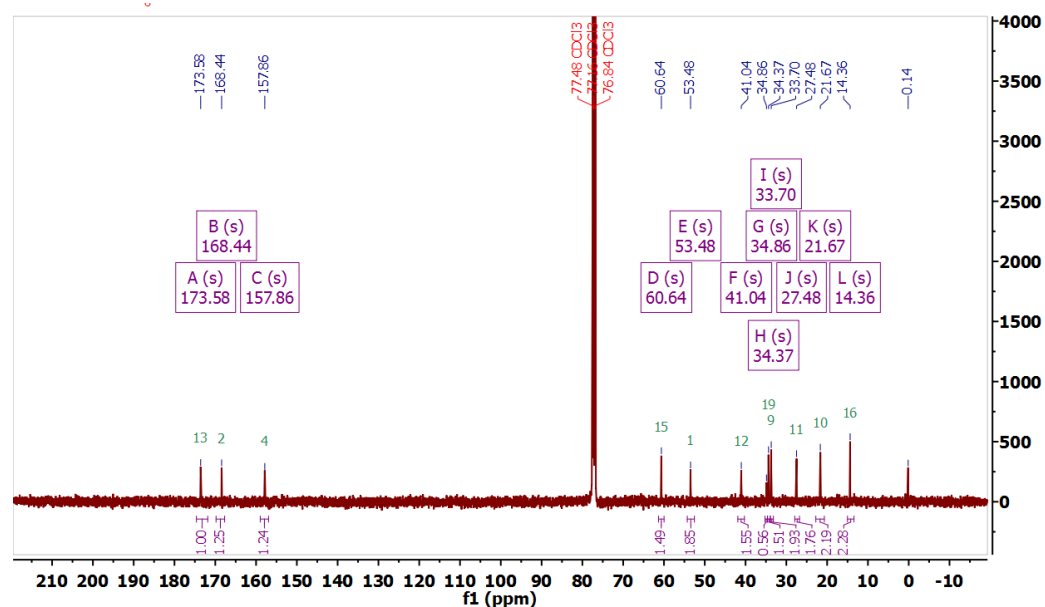

**Figure S6:**  $^{13}\text{C}$  NMR of Compound 2 (101 MHz, Chloroform-*d*)  $\delta$  173.58, 168.44, 157.86, 60.64, 53.48, 41.04, 34.86, 34.37, 33.70, 27.48, 21.67, 14.36.

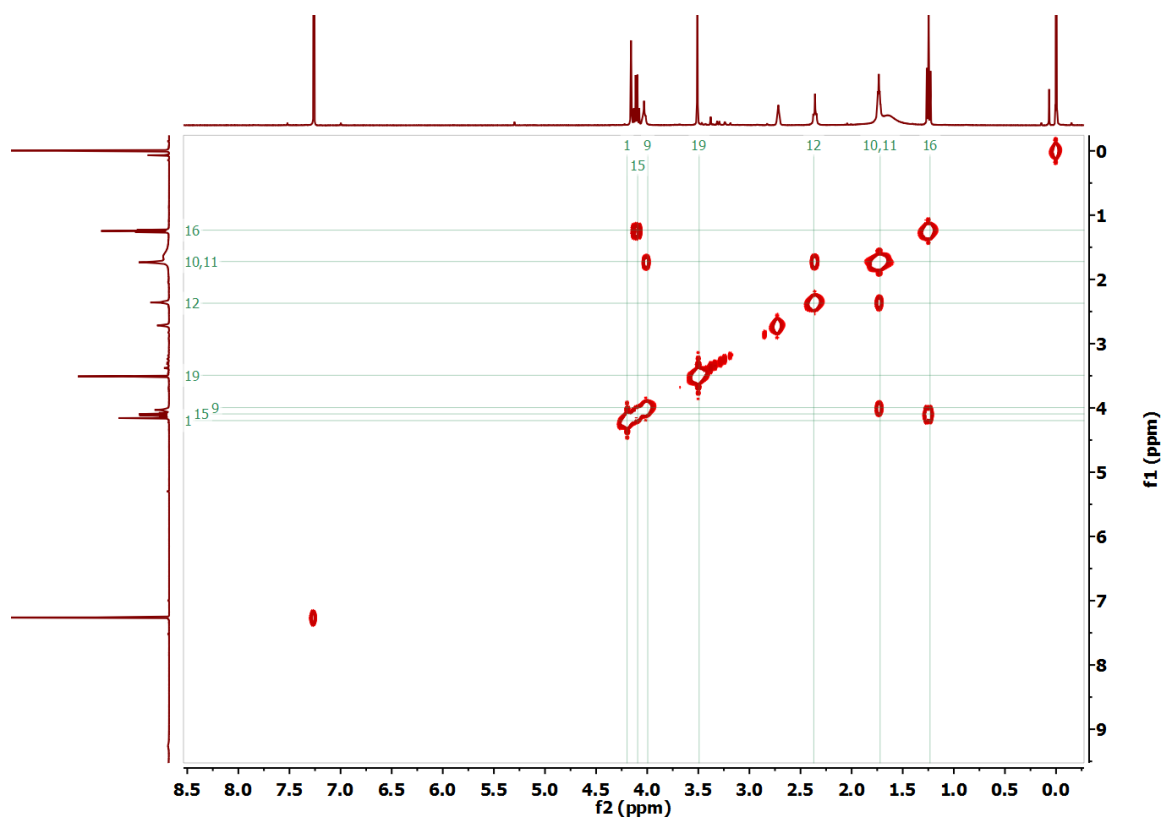

Figure S7:  $^1\text{H}$  COSY of Compound 2.

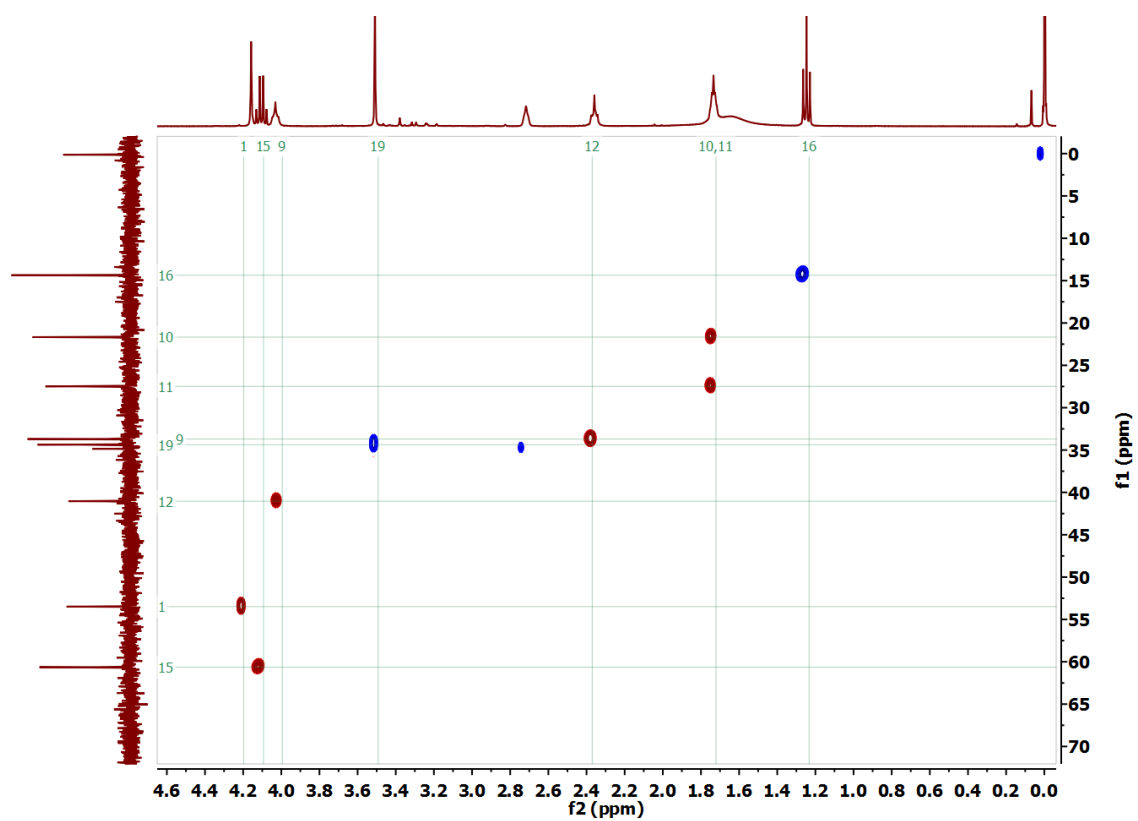

Figure S8:  $^1\text{H}$ - $^{13}\text{C}$  HSQC of Compound 2.

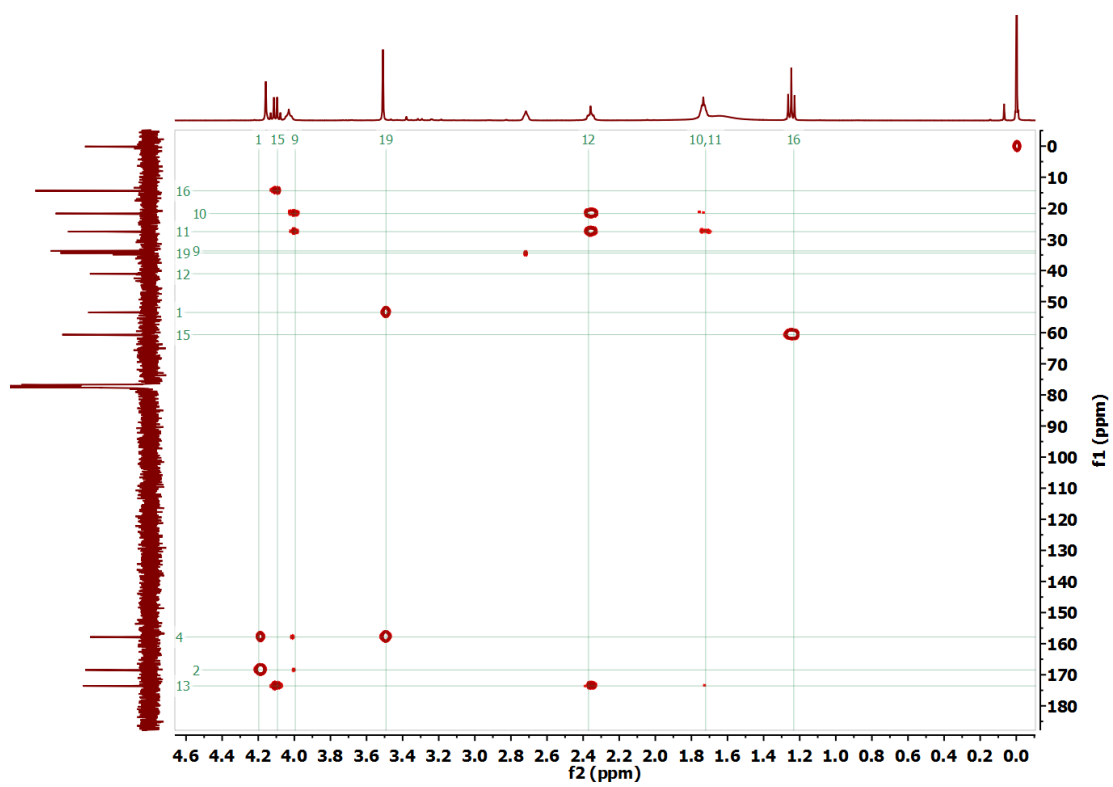

Figure S9:  $^1\text{H}$ - $^{13}\text{C}$  HMBC of compound 2.

**Table S1.** Assignment of Compound **2** protons and their correlations in  $^1\text{H}$ -COSY and  $^1\text{H}$ - $^{13}\text{C}$  HMBC.

| Assignment    | Shift       | Range           | H's | Integral | Class    | J's                          | $^1\text{H}$ -COSY                      | $^1\text{H}$ - $^{13}\text{C}$ HMBC                                                                                                                |
|---------------|-------------|-----------------|-----|----------|----------|------------------------------|-----------------------------------------|----------------------------------------------------------------------------------------------------------------------------------------------------|
| <b>16</b>     | <b>1.25</b> | 1.28 ..<br>1.22 | 3   | 3.00     | <b>t</b> | 7.12, 7.12                   | <b>H16-H15</b>                          | <b>H16-C15</b><br><b>C16-H15</b>                                                                                                                   |
| <b>10, 11</b> | <b>1.73</b> | 1.83 ..<br>1.69 | 4   | 3.90     | <b>p</b> | 3.62,<br>3.62,<br>3.90, 3.90 | <b>H10/H11-H12</b><br><b>H10/H11-H9</b> | <b>H11-C10</b><br><b>H11-C11</b><br><b>C10-H9</b><br><b>C10-H12</b><br><b>C10-H10/H11</b><br><b>C11-H9</b><br><b>C11-H10/H11</b><br><b>C11-H12</b> |
| <b>12</b>     | <b>2.36</b> | 2.41 ..<br>2.31 | 2   | 2.00     | <b>q</b> | 5.02,<br>5.02, 3.61          | <b>H12-H10/H11</b>                      | <b>H12-C10</b><br><b>H12-C11</b><br><b>H12-C13</b>                                                                                                 |
| <b>19</b>     | <b>3.51</b> | 3.53 ..<br>3.49 | 3   | 2.56     | <b>s</b> |                              |                                         | <b>H19-C1</b><br><b>H19-C4</b>                                                                                                                     |
| <b>9</b>      | <b>4.03</b> | 4.06 ..<br>4.00 | 1   | 1.38     | <b>t</b> | 5.20, 5.20                   | <b>H9-H10/H11</b>                       | <b>H9-C2</b><br><b>H9-C4</b><br><b>H9-C10</b><br><b>H9-C11</b>                                                                                     |
| <b>15</b>     | <b>4.10</b> | 4.14 ..<br>4.07 | 2   | 1.89     | <b>q</b> | 7.18,<br>7.18, 7.17          | <b>H15-H16</b>                          | <b>H15-C13</b><br><b>H15-C16</b><br><b>C15-H16</b>                                                                                                 |
| <b>1</b>      | <b>4.16</b> | 4.18 ..<br>4.14 | 2   | 1.82     | <b>s</b> |                              |                                         | <b>H1-C2</b><br><b>H1-C4</b><br><b>C1-H19</b>                                                                                                      |

The assignment of the proton and carbon peaks of Compound **2** was performed using  $^1\text{H}$  NMR,  $^{13}\text{C}$  NMR,  $^1\text{H}$  COSY and  $^1\text{H}$ - $^{13}\text{C}$  HSQC. The peak appearing at 2.75 ppm in  $^1\text{H}$ -NMR and at 34.86 ppm in the  $^{13}\text{C}$  NMR presumably corresponds to an impurity that could not be assigned. The regioselectivity of the reaction was confirmed using  $^1\text{H}$ - $^{13}\text{C}$  HMBC.

## References

- 1 A. Benkert, F. Scheller, W. Schössler, C. Hentschel, B. Micheel, O. Behrsing, G. Scharte, W. Stöcklein and A. Warsinke, Development of a creatinine ELISA and an amperometric antibody-based creatinine sensor with a detection limit in the nanomolar range *Anal. Chem.*, 2000, **72**, 916–921.
